# Supplementary material for: Phyto-Mediated Synthesis of Silver Nanoparticles Using Terminalia chebula Fruit Extract and Evaluation of Its Cytotoxic and Antimicrobial Potential
Source: PubMed Central journal article supplement (PMC7662631; doi:10.3390/molecules25215042), 2020-10-30
Supplement: molecules-25-05042-s001.pdf [file molecules-25-05042-s001.pdf]

## Supplementary material

The comparative study was carried out by taking pure AgNPs without any organic component. The bactericidal activity tests were carried out with *Bacillus subtilis*, *Escherichia coli*, *Pseudomonas aeruginosa* and *Streptococcus Mutans* bacteria in Nutrient Agar medium. The activity of silver nanoparticles without the organic component towards all the bacterial cultures was done using the well diffusion method.

**Table S1:** Antibacterial activity of silver nanoparticles without organic components prepared using *T. chebula* fruit extract.

| Tested bacteria against silver nanoparticles without organic components |                         |                               |                             |
|-------------------------------------------------------------------------|-------------------------|-------------------------------|-----------------------------|
| Diameter of inhibition zone standard (mm)                               |                         |                               |                             |
| <i>Bacillus subtilis</i>                                                | <i>Escherichia coli</i> | <i>Pseudomonas aeruginosa</i> | <i>Streptococcus Mutans</i> |
| 6                                                                       | 4                       | 5                             | 6                           |

**Note:** The experiments were conducted in triplicates.

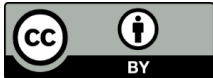

© 2020 by the authors. Licensee MDPI, Basel, Switzerland. This article is an open access article distributed under the terms and conditions of the Creative Commons Attribution (CC BY) license (<http://creativecommons.org/licenses/by/4.0/>).
